# Supplementary material for: A Multiplex Test Assessing MiR663ame and VIMme in Urine Accurately Discriminates Bladder Cancer from Inflammatory Conditions
Source: PubMed Central journal article supplement (PMC7073678; doi:10.3390/jcm9020605), 2020-02-24
Supplement: jcm-09-00605-s001.pdf [file jcm-09-00605-s001.pdf]

**Supplementary Material** – Monteiro-Reis *et al*, Journal of Clinical Medicine, 2020

**Supplementary Table S1** – Sequences of the primers and probes used in the quantitative methylation-specific PCR experiments.

| Primer Set   |                | Sequence                                         | Product size, bp | T <sub>Annealing</sub> °C |
|--------------|----------------|--------------------------------------------------|------------------|---------------------------|
| ACTB_QMSP    | Forward Primer | 5' TGGTGATGGAGGAGGTTTAGTAAG T 3'                 | 133              | 60                        |
|              | Reverse Primer | 5' AACCAATAAAACCTACTCCTCCCTAA 3'                 |                  |                           |
|              | Probe          | 5' CY5 - ACCACCACCCAACACACAATAACAAACACA - MGB 3' |                  |                           |
| miR663a_QMSP | Forward Primer | 5' GGGATAGCGAGGTTAGGTC 3'                        | 101              | 60                        |
|              | Reverse Primer | 5' CATTTCGTAACGAATAAAACCC 3'                     |                  |                           |
|              | Probe          | 5' VIC - CTCTTCCTCGCCTACG - MGB 3'               |                  |                           |
| VIM_QMSP     | Forward Primer | 5' TTCGGGAGTTAGTTCGCGTT 3'                       | 108              | 60                        |
|              | Reverse Primer | 5' ACCGCCGAACATCCTACGA 3'                        |                  |                           |
|              | Probe          | 5' FAM - TCGTCGTTTAGGTTATCGT - MGB 3'            |                  |                           |

**Supplementary Table S2** – Performance of *VIM<sub>me</sub>*, *miR663a<sub>me</sub>*, and *VIM<sub>me</sub>-miR663a<sub>me</sub>* panel for the detection of bladder cancer in Tissues and Testing Cohort (urines). (PPV – positive predictive value; NPV – negative predictive value)

| Samples              | Biomarker Performance | <i>VIM<sub>me</sub></i> (%) | <i>miR663a<sub>me</sub></i> (%) | <i>miR663a<sub>me</sub>-VIM<sub>me</sub></i> (%) |
|----------------------|-----------------------|-----------------------------|---------------------------------|--------------------------------------------------|
| Tissues              | Sensitivity           | 94.4                        | 76.6                            | 96.3                                             |
|                      | Specificity           | 94.1                        | 94.1                            | 88.2                                             |
|                      | PPV                   | 99.0                        | 98.8                            | 98.1                                             |
|                      | NPV                   | 72.7                        | 39,0                            | 78.9                                             |
|                      | Accuracy              | 94.4                        | 79.0                            | 95.2                                             |
| Testing Set (Urines) | Sensitivity           | 78.6                        | 82.1                            | 92.6                                             |
|                      | Specificity           | 96.4                        | 82.1                            | 75.0                                             |
|                      | PPV                   | 97.1                        | 87.3                            | 80.6                                             |
|                      | NPV                   | 75.0                        | 75.4                            | 90.0                                             |
|                      | Accuracy              | 85.7                        | 82.1                            | 84.3                                             |

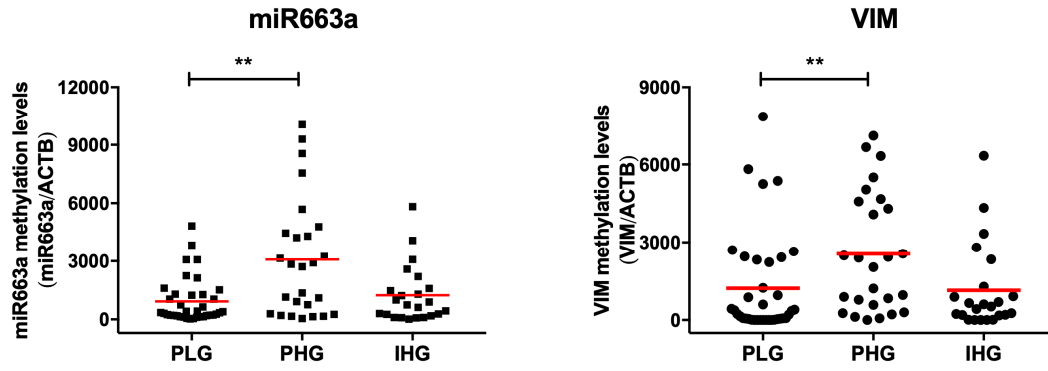

**Supplementary Figure S1** – Distribution of *miR663a*<sub>me</sub> and *VIM*<sub>me</sub> levels in bladder carcinoma (BlCa; n=94) tissue samples categorized by grade. Mann-Whitney U test, \*\*P<0.01. (PLG – Papillary Low Grade; PHG - Papillary High Grade; IHG – Invasive High Grade).

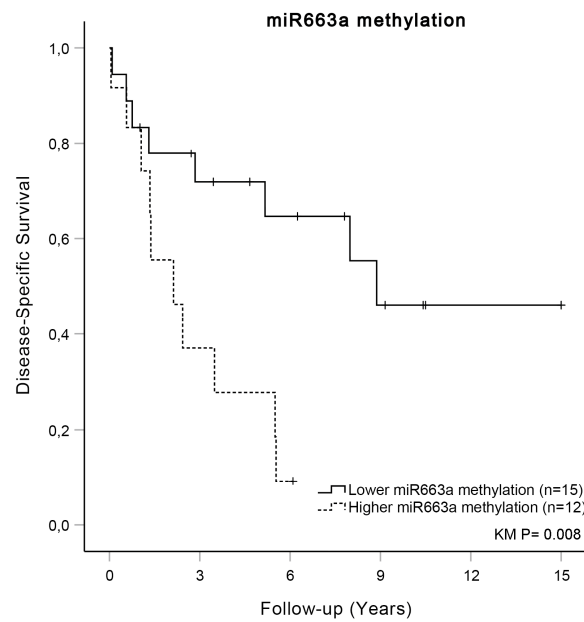

**Supplementary Figure S2** – Kaplan-Meier (KM) curves representing disease-specific survival according to *miR663a*<sub>me</sub> status.
